# Supplementary material
Source: HighWire-hosted journal article supplement (https://bmjopen.bmj.com/content/13/3/e065240)
Supplement: inline-supplementary-material-1 [file inline-supplementary-material-1.pdf]

Supplemental Files

Table S1. Results from sensitivity analysis: associations between famine exposure and PS risk, odds ratio (95% confidence interval).

| Models           | Unexposed<br>(n = 1,291) | Fetal exposed<br>(n = 486) | Infant exposed<br>(n = 301) | Preschool exposed<br>(n = 744) |
|------------------|--------------------------|----------------------------|-----------------------------|--------------------------------|
| Mean age (years) | 51.8                     | 50.8                       | 53.0                        | 54.5                           |
| Model 1          |                          |                            |                             |                                |
| OR (95% CI)      | Ref                      | 1.53 (1.17, 1.99)          | 2.92 (2.20, 3.88)           | 2.55 (2.05, 3.16)              |
| P                |                          | 0.002                      | <0.001                      | <0.001                         |
| Model 2          |                          |                            |                             |                                |
| OR (95% CI)      | Ref                      | 1.52 (1.17, 1.99)          | 3.07 (2.31, 4.09)           | 2.60 (2.08, 3.23)              |
| P                |                          | 0.002                      | <0.001                      | <0.001                         |
| Model 3          |                          |                            |                             |                                |
| OR (95% CI)      | Ref                      | 1.51 (1.15, 1.98)          | 2.97 (2.22, 3.98)           | 2.43 (1.94, 3.05)              |
| P                |                          | 0.003                      | <0.001                      | <0.001                         |

Note: OR, odds ratio; CI, confidence interval; Ref, reference. Model 1, unadjusted for any covariate. Model 2, adjusted for sex. Model 3 further adjusted for region, marital status, nutritional status, smoking, drinking, education level, economic status. Data of fetal, infant, and preschool exposed groups came from CHARLS 2011, data of unexposed group came from CHARLS 2015.

| Table S2. Associations between famine exposure and possible sarcopenia risk by sex, stratified by region, nutritional status, smoking, drinking.                                                                                                                                                                                                                                                                                                          |                   |                     |                     |                                 |                   |                      |                     |                                 |                    |                     |                     |                                 |  |
|-----------------------------------------------------------------------------------------------------------------------------------------------------------------------------------------------------------------------------------------------------------------------------------------------------------------------------------------------------------------------------------------------------------------------------------------------------------|-------------------|---------------------|---------------------|---------------------------------|-------------------|----------------------|---------------------|---------------------------------|--------------------|---------------------|---------------------|---------------------------------|--|
| Sex                                                                                                                                                                                                                                                                                                                                                                                                                                                       |                   | Total               |                     |                                 |                   | Male                 |                     |                                 |                    | Female              |                     |                                 |  |
| Groups                                                                                                                                                                                                                                                                                                                                                                                                                                                    | Fetal exposed     | Infant exposed      | Preschool exposed   | <i>P</i> <sub>interaction</sub> | Fetal exposed     | Infant exposed       | Preschool exposed   | <i>P</i> <sub>interaction</sub> | Fetal exposed      | Infant exposed      | Preschool exposed   | <i>P</i> <sub>interaction</sub> |  |
| Total                                                                                                                                                                                                                                                                                                                                                                                                                                                     | 0.91 (0.69, 1.19) | 1.55 (1.17, 2.05)** | 1.46 (1.17, 1.26)** | 0.719                           | 1.16 (0.74, 1.83) | 2.15 (1.40, 3.31)**  | 1.78 (1.23, 2.57)** | 0.111                           | 0.80 (0.57, 1.12)  | 1.21 (0.83, 1.77)   | 1.32 (0.99, 1.75)*  | 0.960                           |  |
| Region                                                                                                                                                                                                                                                                                                                                                                                                                                                    |                   |                     |                     |                                 |                   |                      |                     |                                 |                    |                     |                     |                                 |  |
| Urban area                                                                                                                                                                                                                                                                                                                                                                                                                                                | 0.81 (0.43, 1.52) | 1.37 (0.77, 2.44)   | 1.11 (0.61, 2.17)   |                                 | 0.61 (0.22, 1.68) | 1.49 (0.65, 3.40)    | 0.64 (0.28, 1.47)   |                                 | 0.92 (0.41, 2.07)  | 1.23 (0.54, 2.82)   | 1.52 (0.80, 2.89)   |                                 |  |
| Rural area                                                                                                                                                                                                                                                                                                                                                                                                                                                | 0.94 (0.70, 1.27) | 1.63 (1.18, 2.24)** | 1.56 (1.22, 2.00)** |                                 | 1.42 (0.85, 2.39) | 2.52 (1.52, 4.20)**  | 2.31 (1.50, 3.55)** |                                 | 0.77 (0.53, 1.12)  | 1.23 (0.81, 1.89)   | 1.27 (0.93, 1.74)   |                                 |  |
| Nutritional status                                                                                                                                                                                                                                                                                                                                                                                                                                        |                   |                     |                     | 0.255                           |                   |                      |                     | 0.011                           |                    |                     |                     | 0.650                           |  |
| Underweight                                                                                                                                                                                                                                                                                                                                                                                                                                               | 0.85 (0.25, 2.99) | 0.87 (0.24, 3.18)   | 1.11 (0.42, 2.91)   |                                 | 0.27 (0.02, 3.01) | 0.96 (0.01, 1.34)    | 0.64 (0.11, 3.58)   |                                 | 1.87 (0.38, 9.09)  | 3.64 (0.63, 21.19)  | 1.88 (0.53, 6.58)   |                                 |  |
| Normal weight                                                                                                                                                                                                                                                                                                                                                                                                                                             | 0.72 (0.47, 1.09) | 1.37 (0.90, 2.08)   | 1.24 (0.90, 1.72)   |                                 | 1.04 (0.57, 1.91) | 1.69 (0.91, 3.14)    | 1.48 (0.90, 2.42)   |                                 | 0.53 (0.29, 0.96)* | 1.15 (0.64, 2.06)   | 1.12 (0.72, 1.73)   |                                 |  |
| Overweight                                                                                                                                                                                                                                                                                                                                                                                                                                                | 1.10 (0.76, 1.61) | 1.91 (1.29, 2.84)** | 1.71 (1.24, 2.36)** |                                 | 1.54 (0.73, 3.23) | 4.04 (2.11, 7.74)**  | 2.53 (1.36, 4.68)** |                                 | 0.95 (0.61, 1.48)  | 1.18 (0.70, 2.01)   | 1.46 (0.99, 2.16)   |                                 |  |
| Smoking                                                                                                                                                                                                                                                                                                                                                                                                                                                   |                   |                     |                     | 0.848                           |                   |                      |                     | 0.140                           |                    |                     |                     | 0.098                           |  |
| Never                                                                                                                                                                                                                                                                                                                                                                                                                                                     | 0.95 (0.59, 1.52) | 1.82 (1.16, 2.87)** | 1.59 (1.10, 2.30)*  |                                 | 2.02 (0.60, 6.75) | 6.40 (2.28, 17.98)** | 2.26 (0.82, 6.25)   |                                 | 0.83 (0.59, 1.17)  | 1.08 (0.73, 1.61)   | 1.33 (0.99, 1.78)   |                                 |  |
| Former/Current                                                                                                                                                                                                                                                                                                                                                                                                                                            | 0.89 (0.64, 1.23) | 1.38 (0.96, 1.97)   | 1.39 (1.05, 1.84)*  |                                 | 1.05 (0.64, 1.72) | 1.68 (1.03, 2.73)*   | 1.67 (1.11, 2.48)*  |                                 | 0.33 (0.06, 1.82)  | 5.14 (1.29, 20.48)* | 1.17 (0.42, 3.30)   |                                 |  |
| Drinking                                                                                                                                                                                                                                                                                                                                                                                                                                                  |                   |                     |                     | 0.392                           |                   |                      |                     | 0.010                           |                    |                     |                     | 0.018                           |  |
| Never                                                                                                                                                                                                                                                                                                                                                                                                                                                     | 0.95 (0.69, 1.30) | 1.34 (0.95, 1.89)   | 1.42 (1.09, 1.85)*  |                                 | 1.99 (0.96, 4.10) | 2.21 (1.05, 4.66)*   | 3.42 (1.86, 6.32)** |                                 | 0.81 (0.56, 1.16)  | 1.20 (0.81, 1.80)   | 1.13 (0.83, 1.52)   |                                 |  |
| Current                                                                                                                                                                                                                                                                                                                                                                                                                                                   | 0.79 (0.47, 1.34) | 2.04 (1.27, 3.29)** | 1.54 (1.03, 2.32)*  |                                 | 0.81 (0.44, 1.49) | 2.21 (1.31, 3.75)**  | 1.11 (0.68, 1.81)   |                                 | 0.70 (0.24, 2.04)  | 1.21 (0.39, 3.79)   | 3.49 (1.59, 7.67)** |                                 |  |
| Note: The reference of model: unexposed group. The model adjusted for all the covariates (region, marital status, nutritional status, smoking, drinking, education level, economic status) except for the stratification covariate. <i>P</i> <sub>interaction</sub> : <i>P</i> -value of interaction between famine exposed group and stratification covariate in the model adjusted for all the other covariates. * <i>P</i> < 0.05, ** <i>P</i> < 0.01. |                   |                     |                     |                                 |                   |                      |                     |                                 |                    |                     |                     |                                 |  |
